# Supplementary material for: Northern Scandinavian mountains supported by a low-grade eclogitic crustal keel
Source: Springer Nature journal article supplement (doi:10.1038/s41467-025-55865-3), 2025-01-11
Supplement: MOESM1 [file 41467_2025_55865_MOESM1_ESM.pdf]

## Supplementary Information for

### **Northern Scandinavian Mountains Supported by a Low-grade Eclogitic Crustal Keel**

Metin Kahraman, Hans Thybo, Irina M. Artemieva, Alexey Shulgin, Peter Hedin, Rolf Mjelde

Correspondence to: h.thybo@gmail.com

This file includes:

- |                                |                                                                                                                                       |
|--------------------------------|---------------------------------------------------------------------------------------------------------------------------------------|
| Supplementary Figure 1.        | Resolution test for the velocity model.                                                                                               |
| Supplementary Figures 2 - 4.   | Ray coverage, travelttime fit and seismic sections with reduction velocity $8 \text{ km s}^{-1}$ for three stacked airgun sources.    |
| Supplementary Figures 5 - 9.   | Ray coverage, travelttime fit and seismic sections with reduction velocity $8 \text{ km s}^{-1}$ all five land shots.                 |
| Supplementary Figure 10.       | Ray coverage for PmP and Pn phases, which defines Moho depth and sub-Moho velocity.                                                   |
| Supplementary Figure 11.       | Ray coverage for Pn phases, which defines Moho depth and sub-Moho velocity with constant $8.2 \text{ km s}^{-1}$ sub-Moho P velocity. |
| Supplementary Figure 12.       | Ray coverage for PmP and Pn phases, which defines $7^\circ$ dip Moho.                                                                 |
| Explanatory Note:              | Gravity Model Sensitivity Test                                                                                                        |
| Supplementary Figures 13 - 16. | Gravity model sensitivity test for upper mantle density variations.                                                                   |
| Supplementary Figures 17 - 18. | Gravity model sensitivity test for compensation depth at 110 and 130 km, respectively.                                                |
| Supplementary Table 1.         | Seismic station parameters for data acquisition.                                                                                      |
| Supplementary Table 2.         | Shot parameters for data acquisition.                                                                                                 |
| Supplementary Table 3.         | Statistical parameters of seismic P-wave modelling for all shots.                                                                     |
| Supplementary Table 4.         | Statistical parameters of seismic P-wave modelling for onshore explosive sources.                                                     |

Supplementary Table 5. Statistical parameters of seismic P-wave modelling for airgun shots.

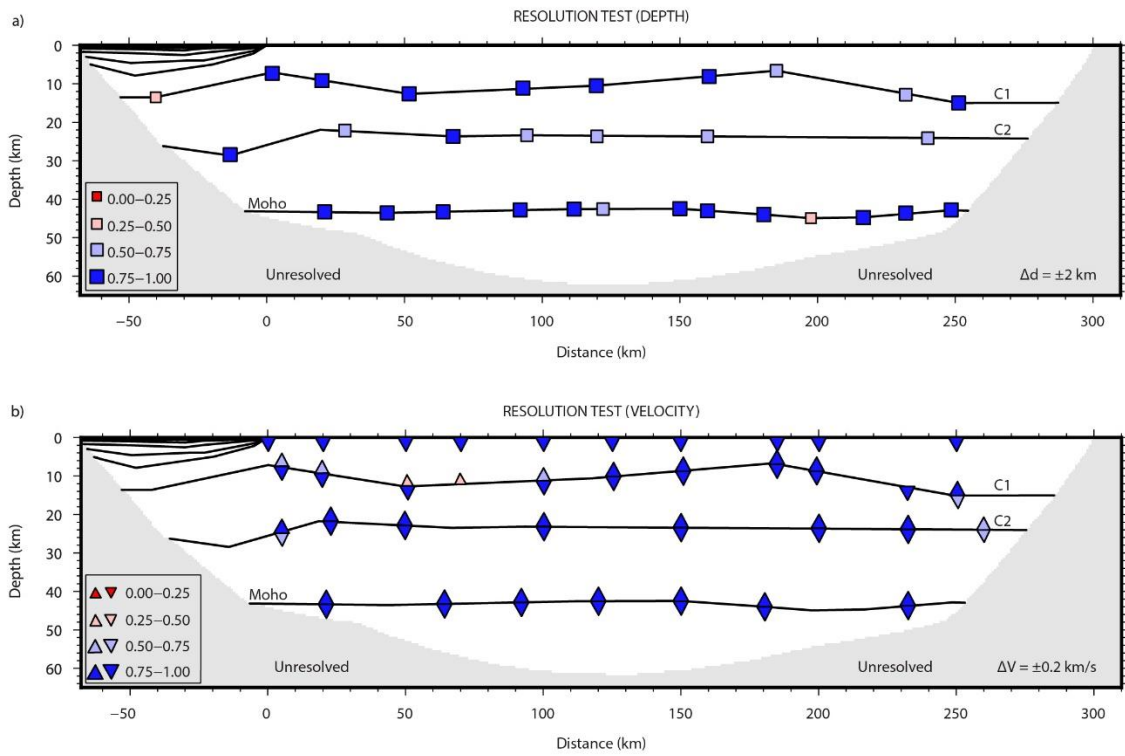

**Supplementary Figure 1. Resolution test for the velocity model derived from the calculated diagonal values of the resolution matrix for depth and velocity. a) Resolution of depth to crustal discontinuities is generally high, in particular for the Moho depth. Depth uncertainty is  $\Delta d = \pm 2$  km. b) Resolution of seismic P-wave velocity is generally high at all depth levels, including sub-Moho velocities. Velocity uncertainty is  $\Delta V = \pm 0.2$  km s<sup>-1</sup>.**

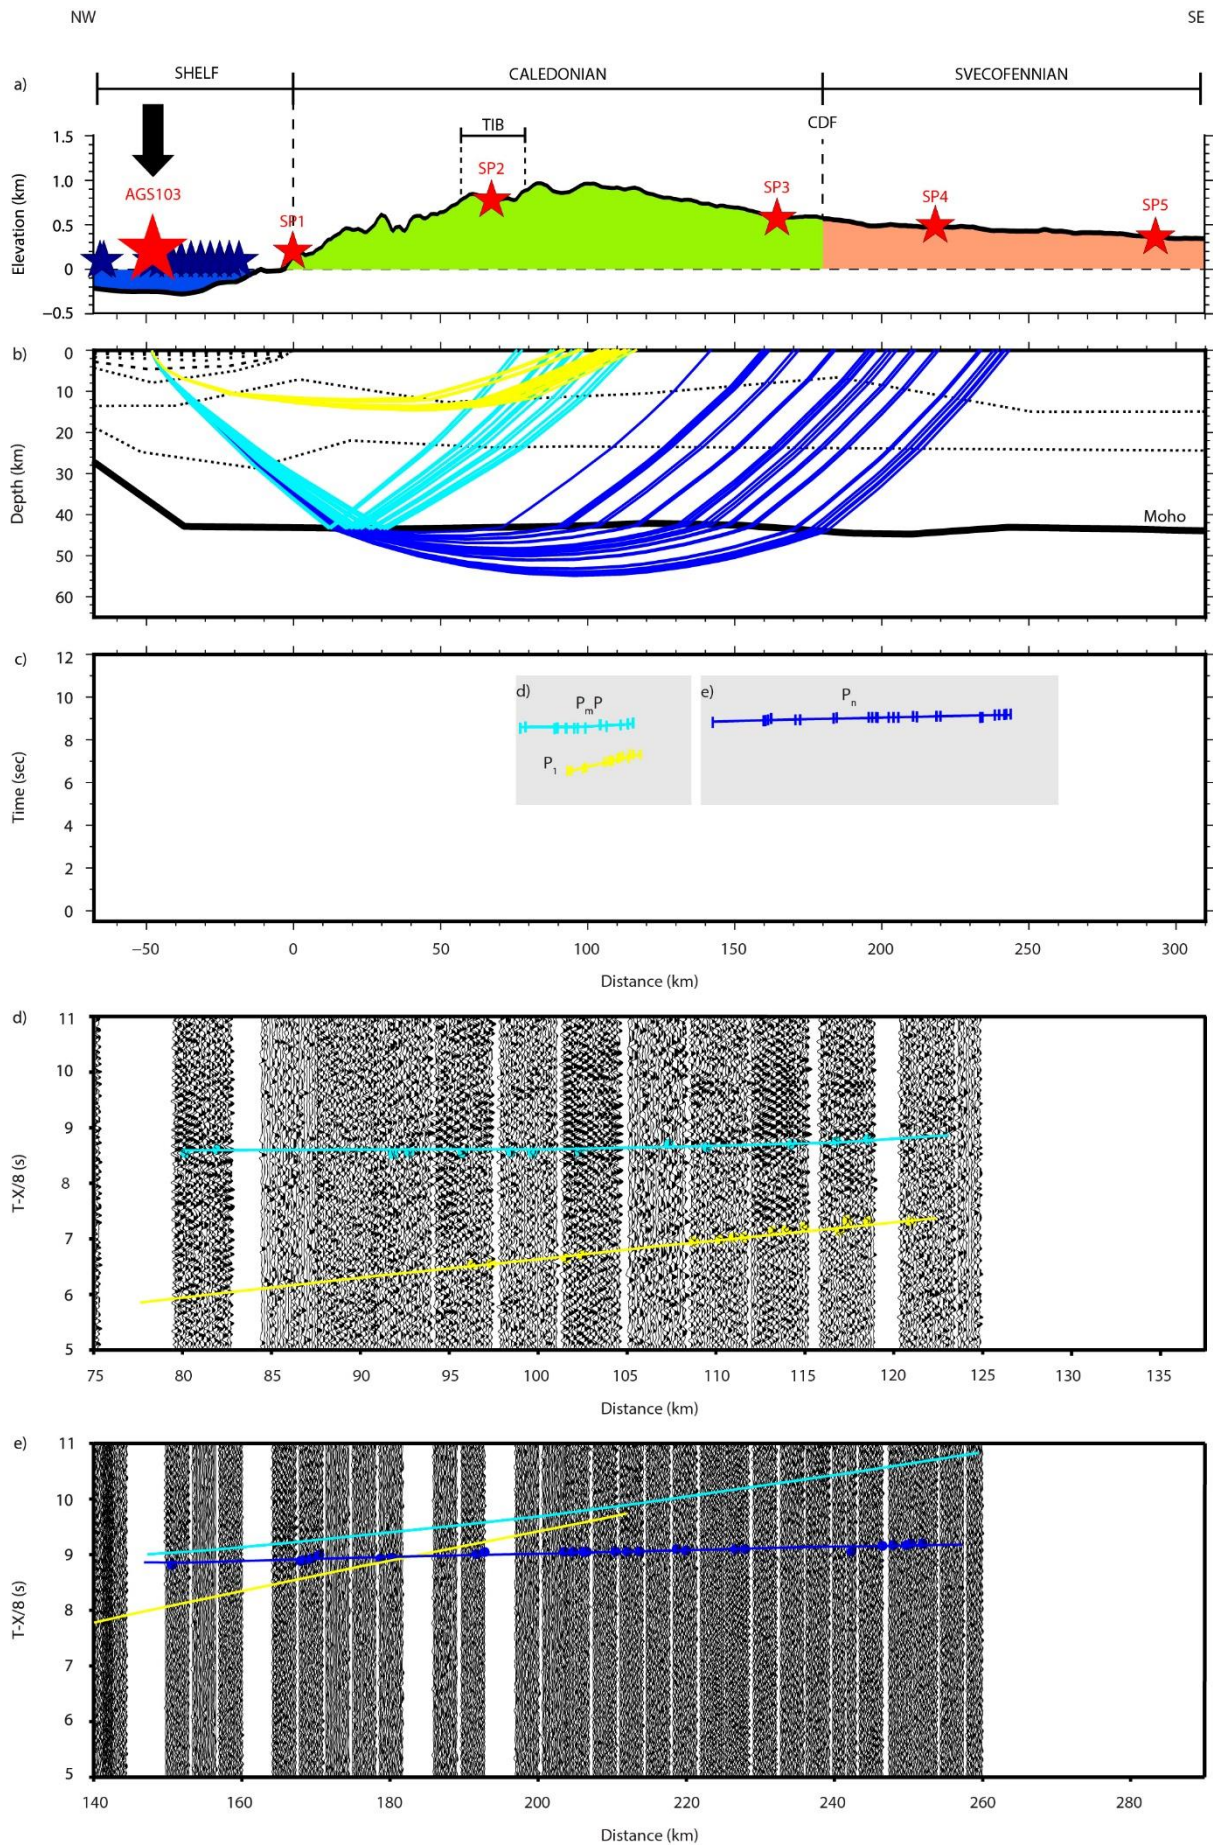

**Supplementary Figure 2. Seismic travel time fit for airgun stack AGS103.** a) Hypsometry with traversed geological units and locations of seismic sources: Red stars for onshore explosive sources SP1-5 and blue stars for offshore airgun stack locations AGS101-112, Large red

offshore star shows location of AGS103. Abbreviations: CDF - Caledonian Deformation Front; TIB - Trans-Scandinavian Igneous Belt. **b)** Simplified P-wave velocity model with ray path coverage for AGS103. **c)** Travel time fit for AGS103 for model in Figure 2. Observed travel times are shown by vertical marks with length corresponding to uncertainty of picks, calculated arrival times are shown by solid lines. Abbreviations for seismic phases:  $P_1$  – intra-crustal refraction, PmP – wide-angle reflection from Moho; Pn – refraction from below the seismic Moho. The seismic section is divided into two parts. **d and e)** Seismic sections with travel time picks for AGS103. Calculated arrival times are shown by lines with colour coding as in b and c.

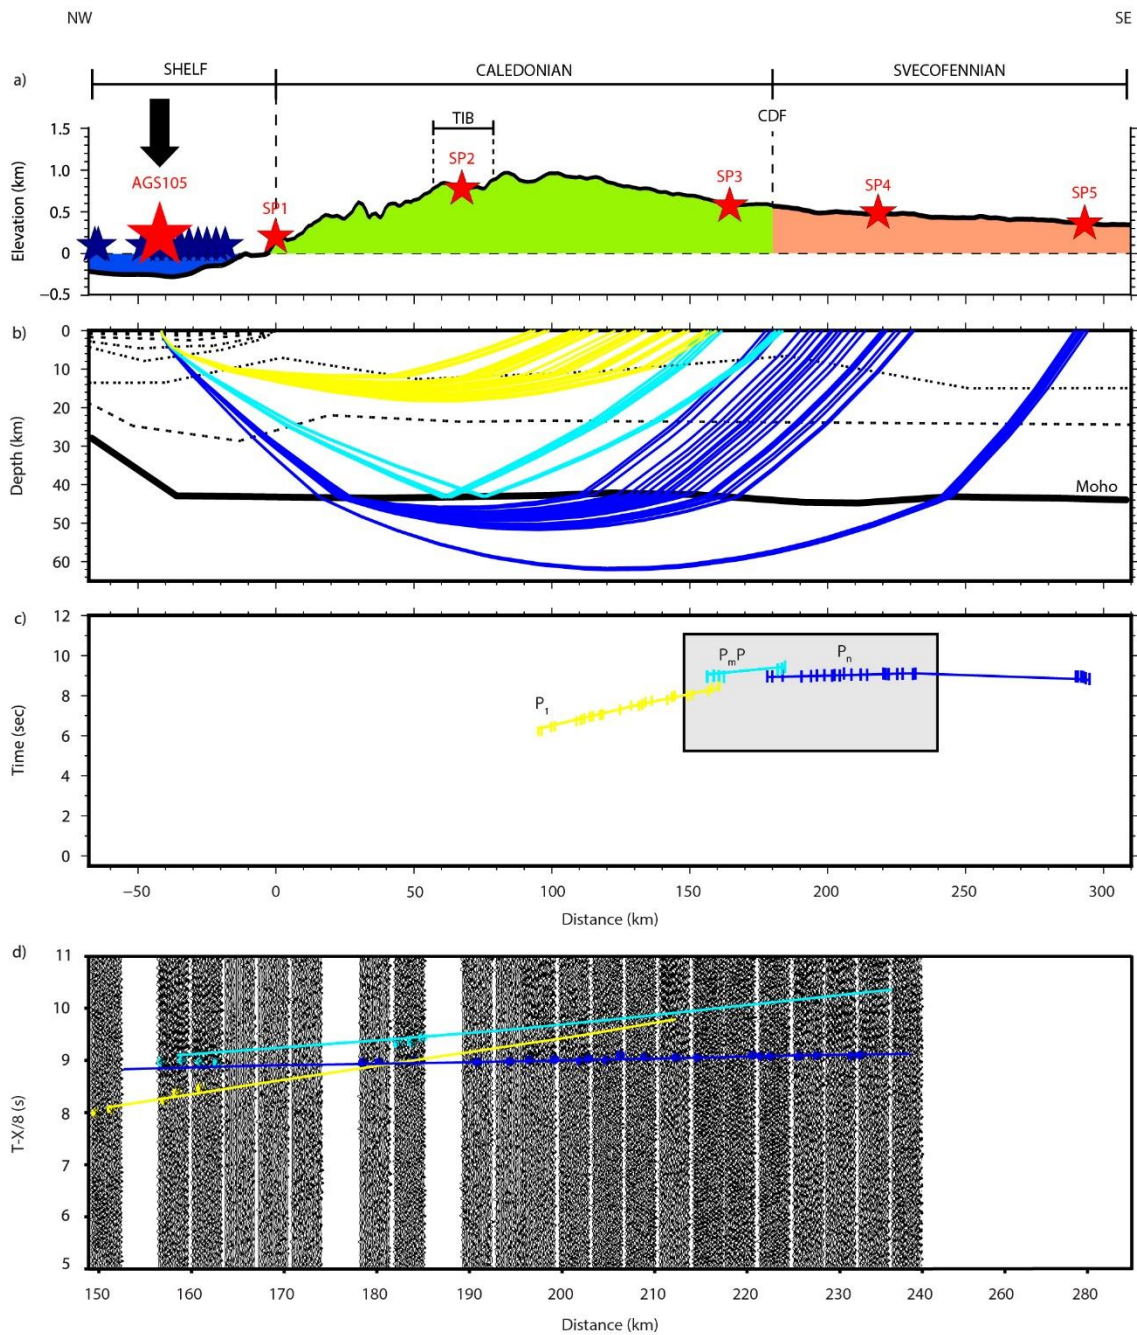

**Supplementary Figure 3. Seismic travel time fit for airgun stack AGS105.** As Supplementary Figure 2 for AGS105 instead of AGS103. The seismic section is presented in one part (d).

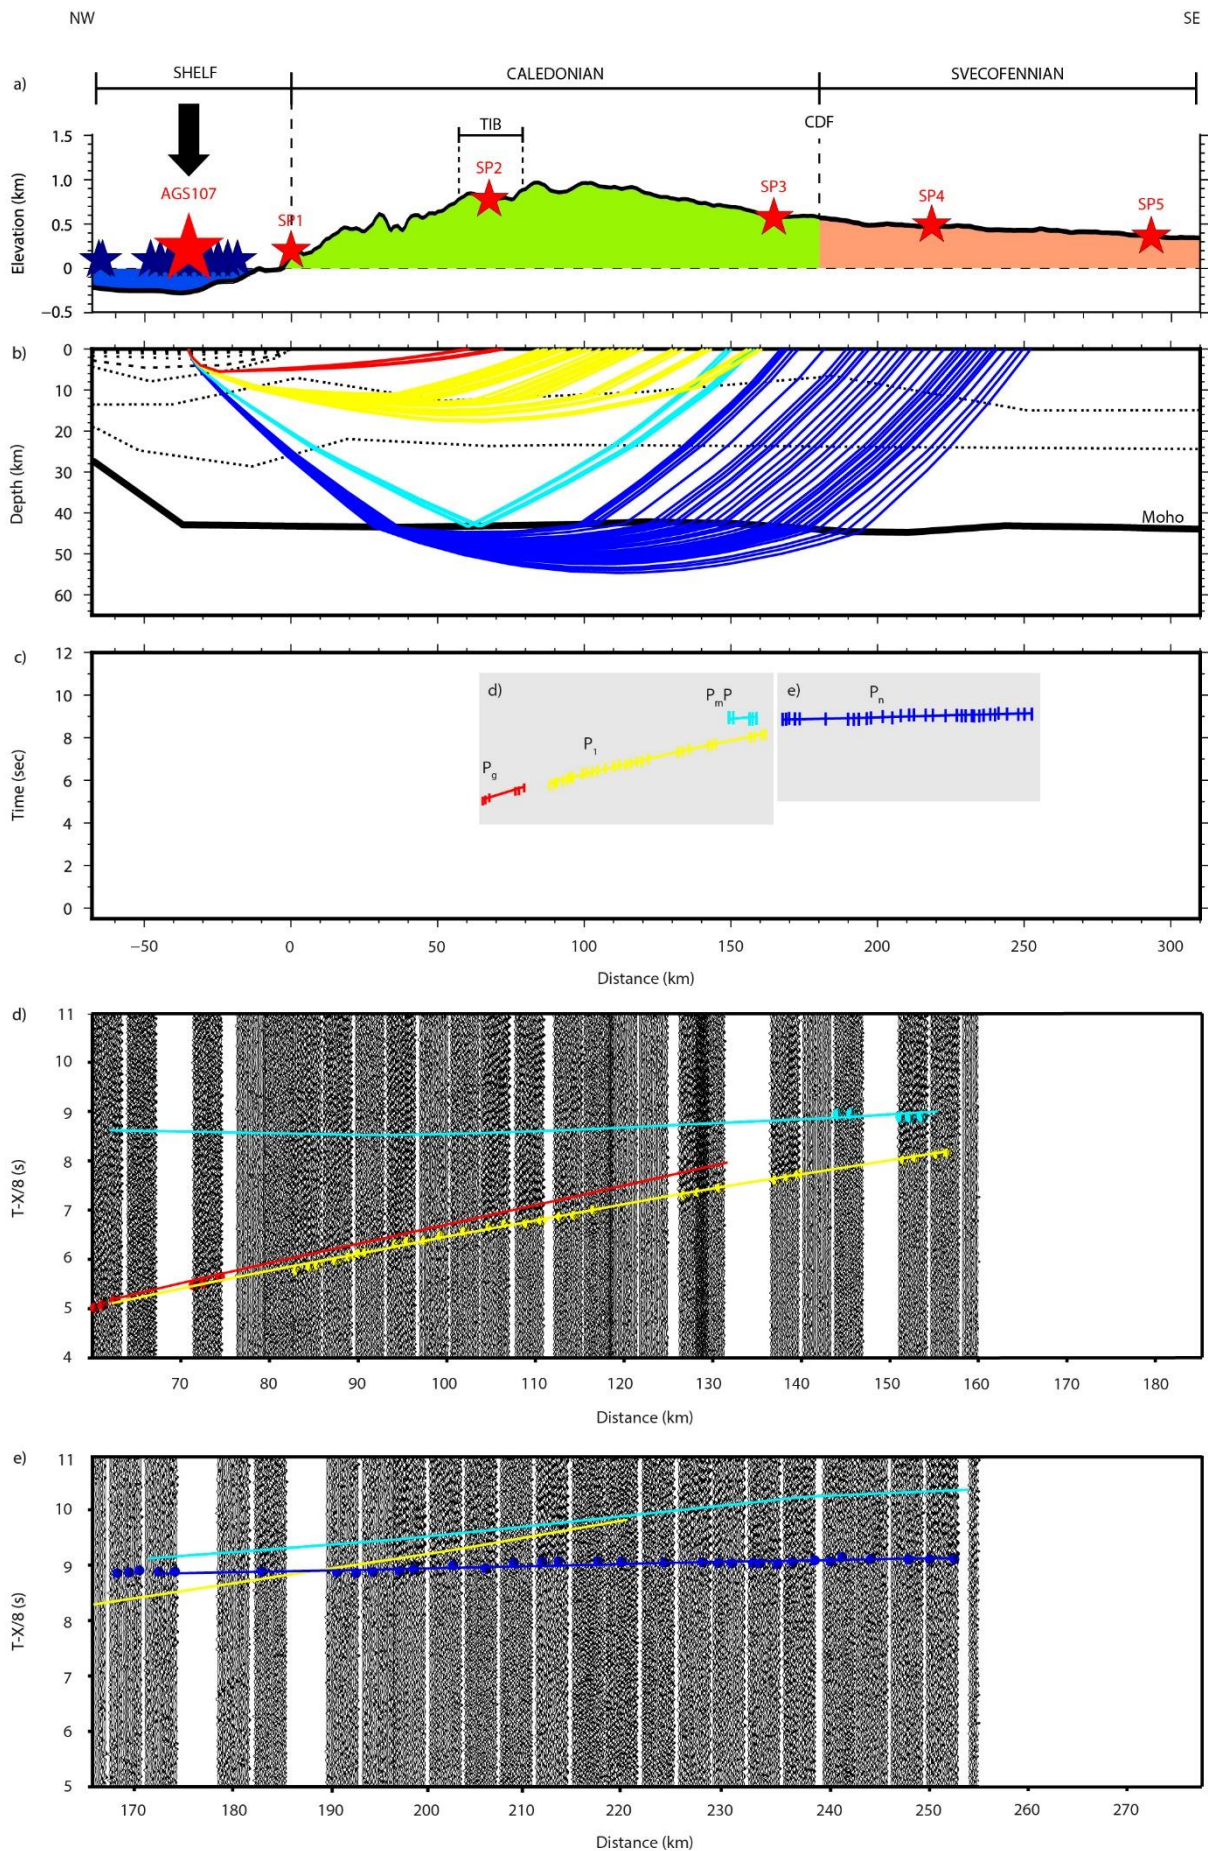

**Supplementary Figure 4. Seismic travel time fit for airgun stack AGS107.** As Supplementary Figure 2 for AGS107 instead of AGS103. The seismic section is divided into two parts. Additional abbreviation: P<sub>g</sub> – Basement refraction. **d and e)** correspond to marked parts in c.

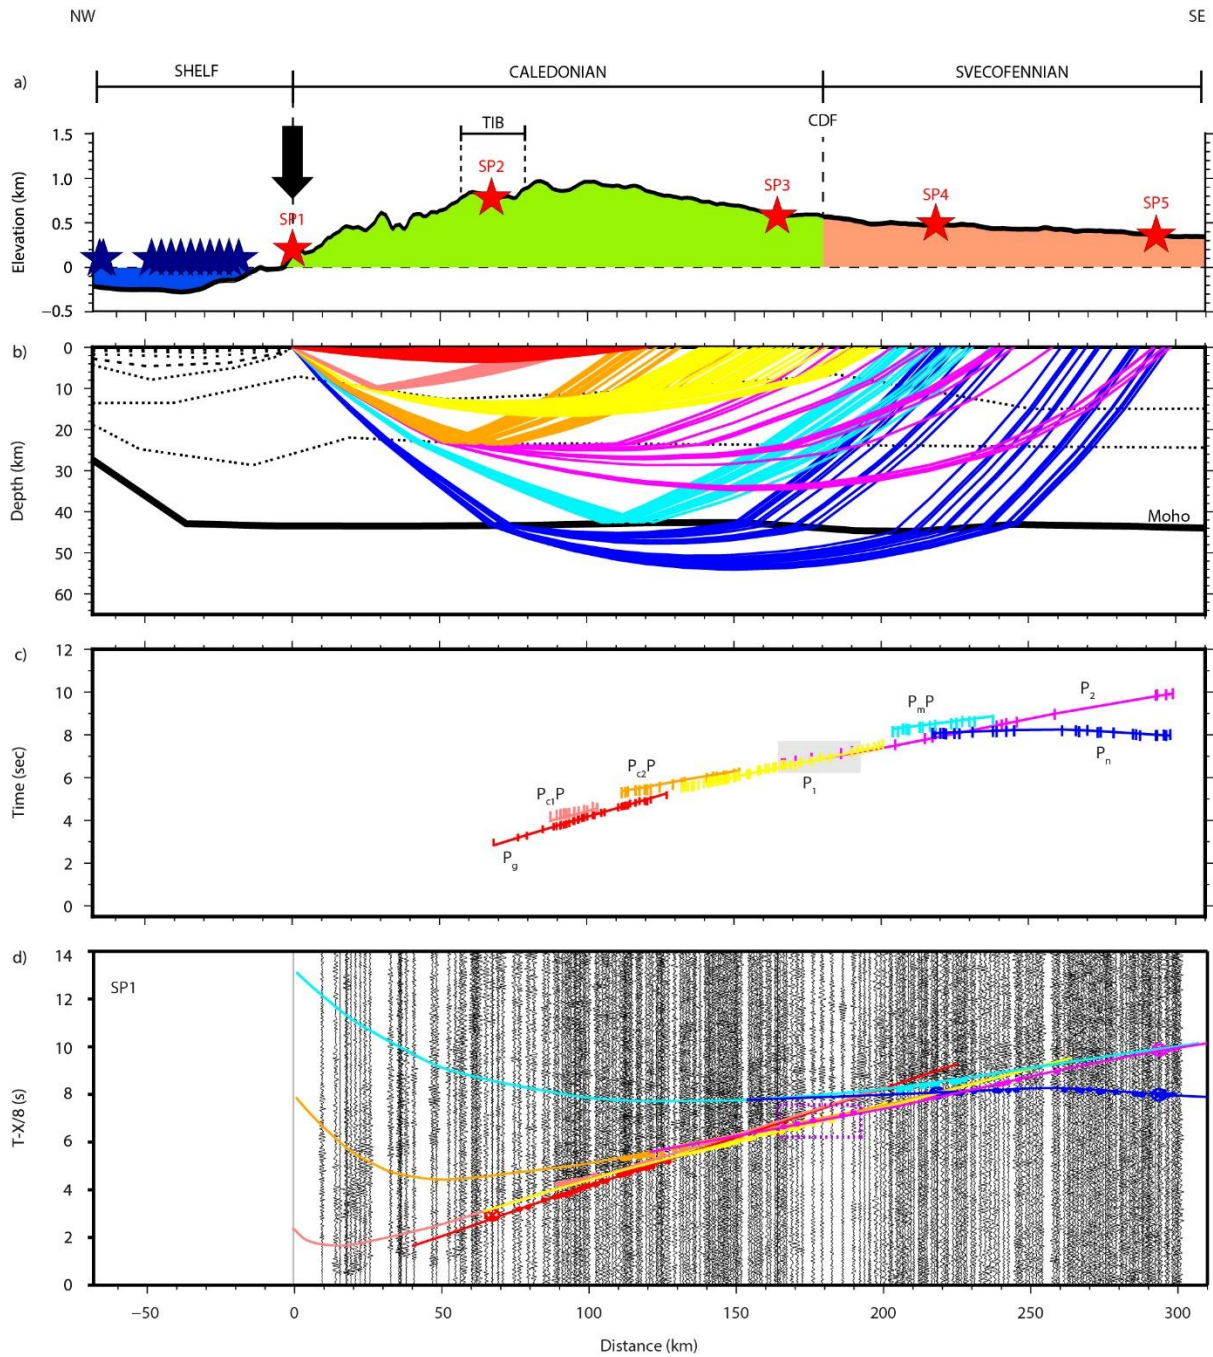

**Supplementary Figure 5. Seismic travel time fit for SP1.** As Supplementary Figure 3 for Sp1 instead of AGS107. Additional abbreviation:  $P_{c1}P$  and  $P_{c2}P$  - Intracrustal reflections. Light gray area in (c) and purple stipple rectangle in (d) are the are where  $P_1$  and  $P_2$  picked times where every other one may every other.



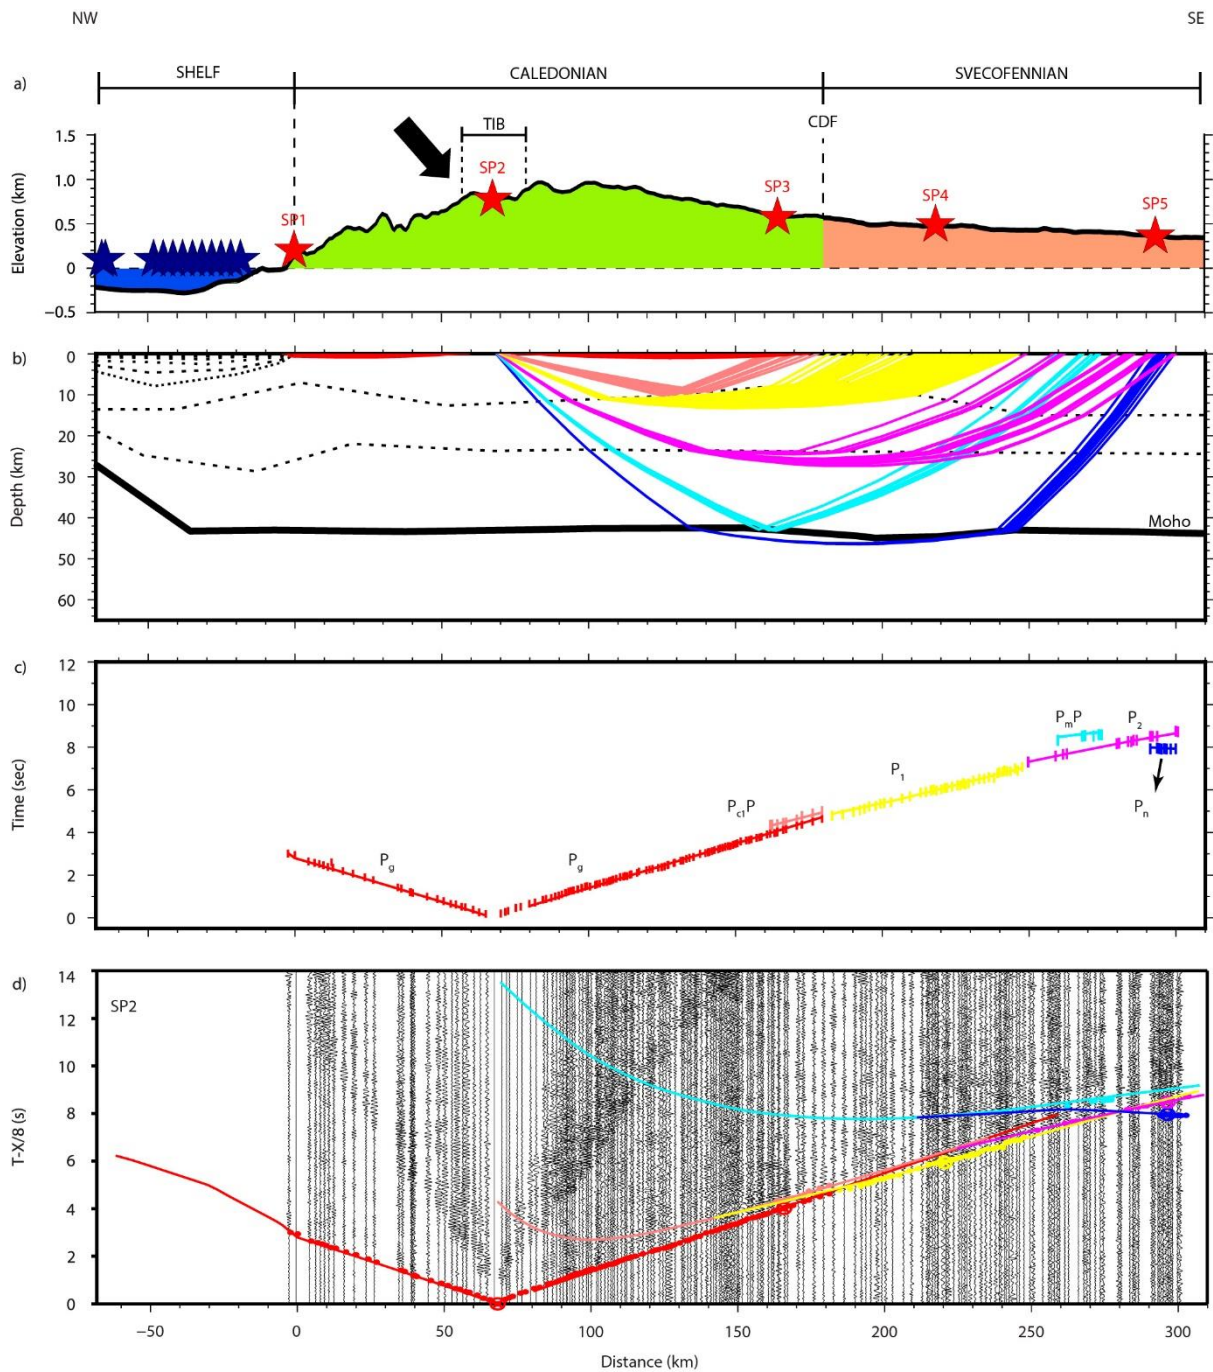

**Supplementary Figure 6. Seismic travel time fit for SP2.** As Supplementary Figure 4 for Sp2 instead of SP1.

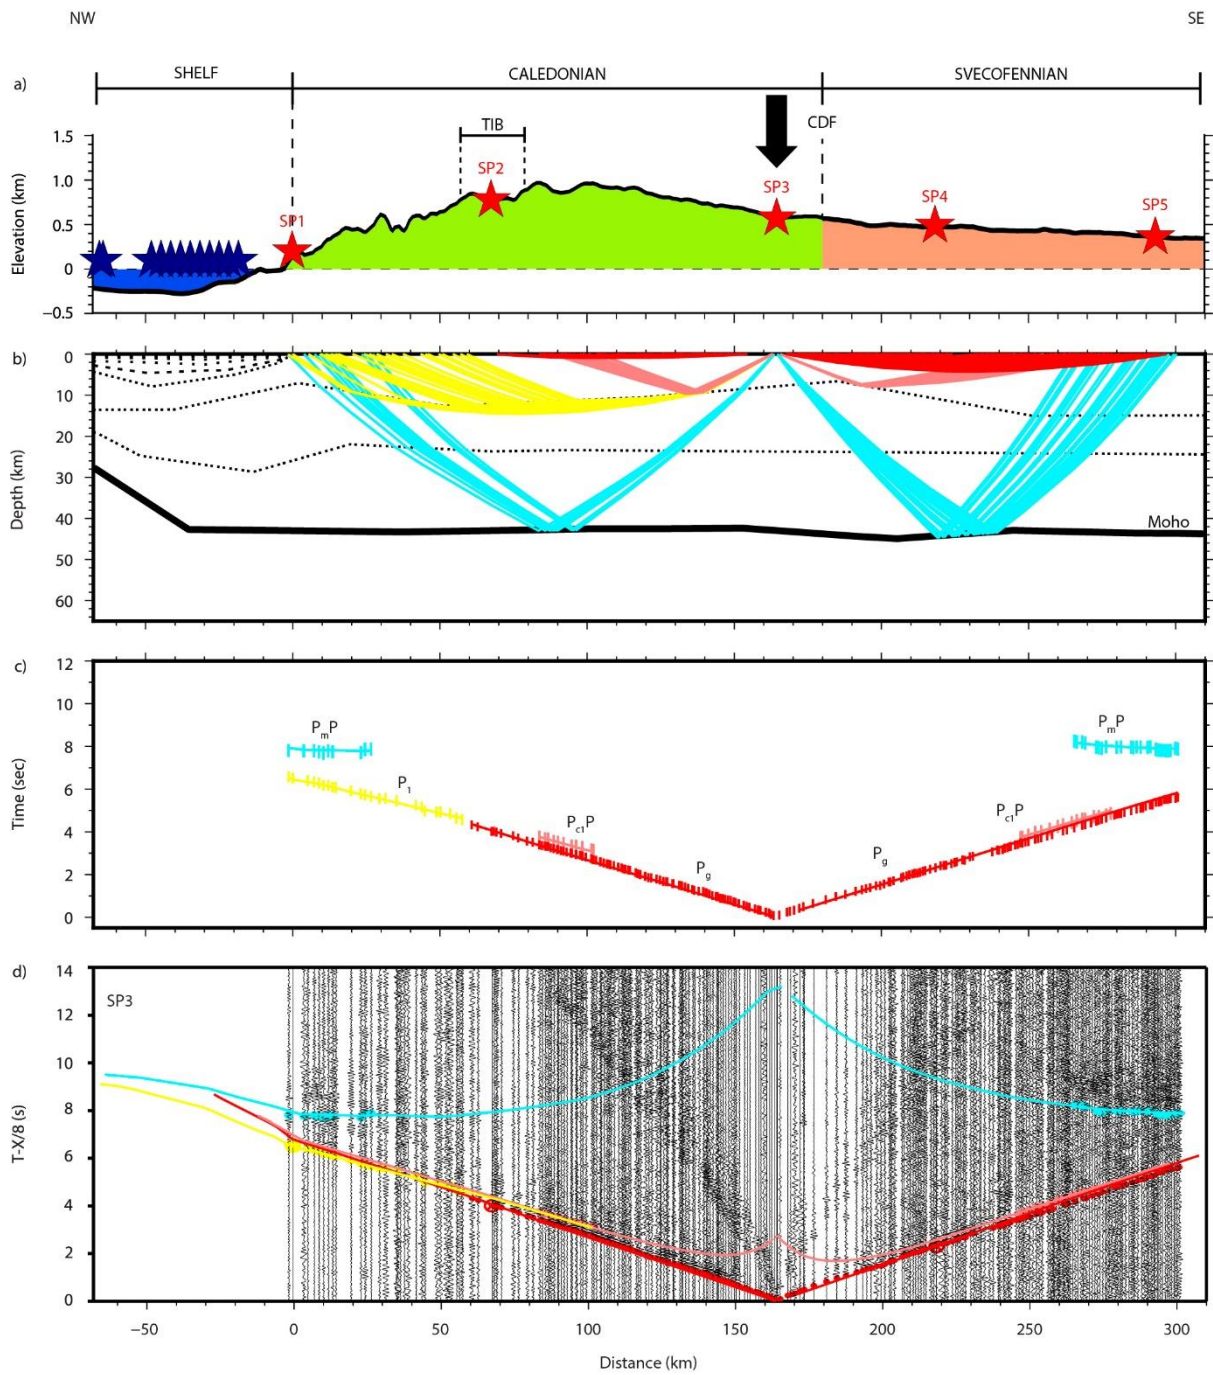

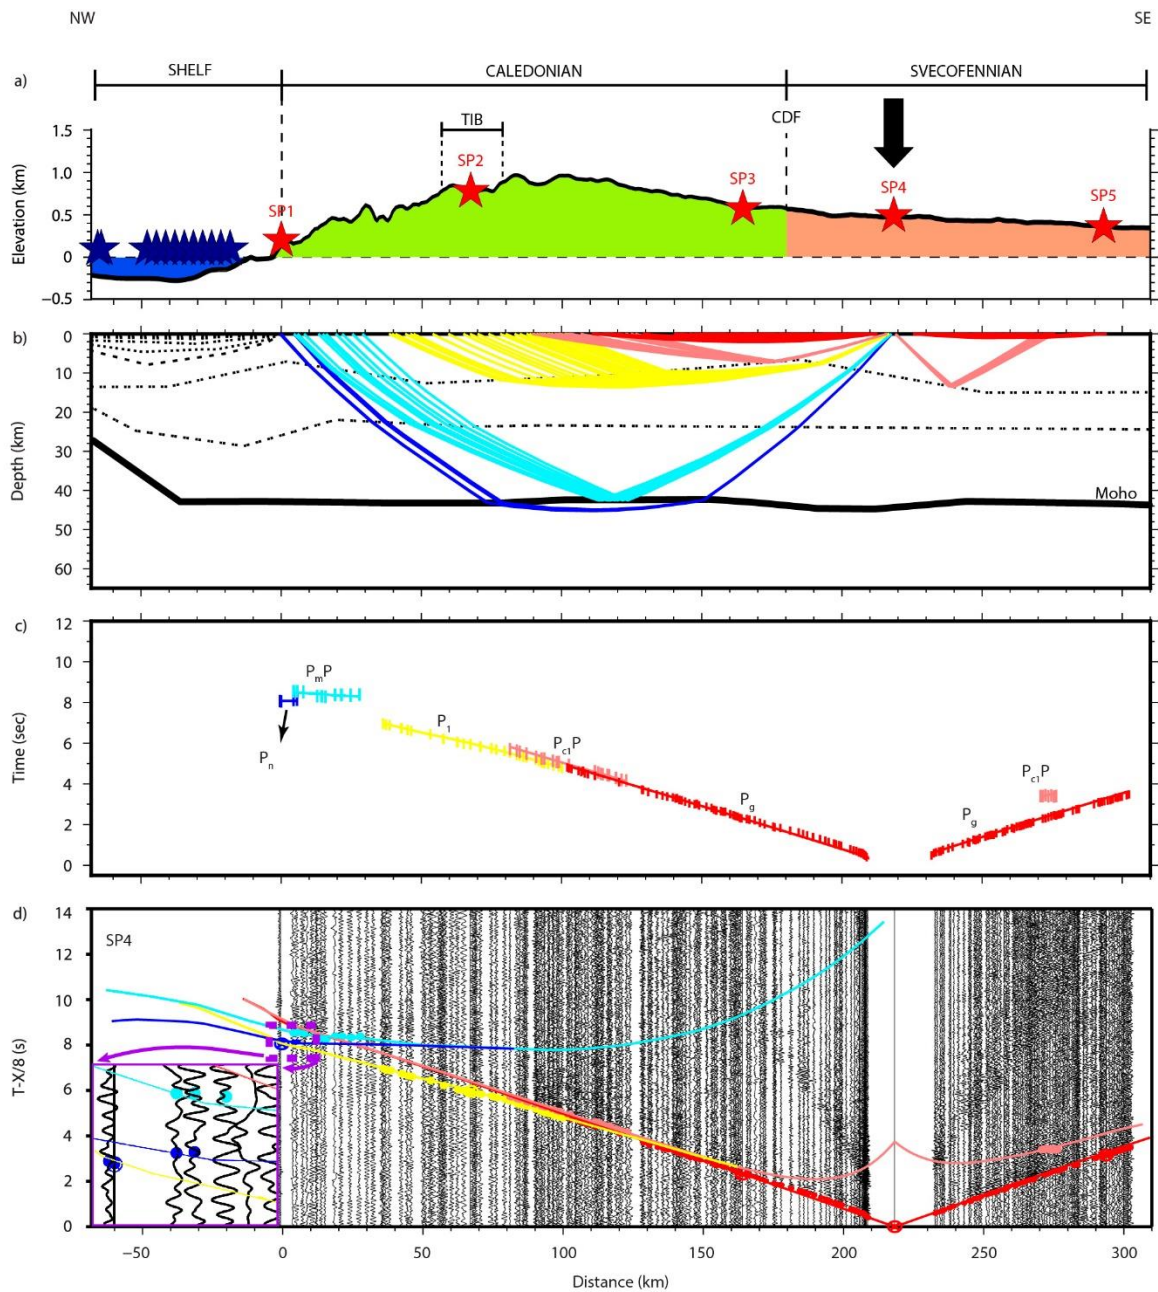

**Supplementary Figure 8. Seismic travel time fit for SP4.** As Supplementary Figure 4 for SP4 instead of SP1. Reciprocal arrival time for  $P_n$  is marked by purple cross with circle (d) and in zoomed display for enhancing resolution of the  $P_n$  phase.

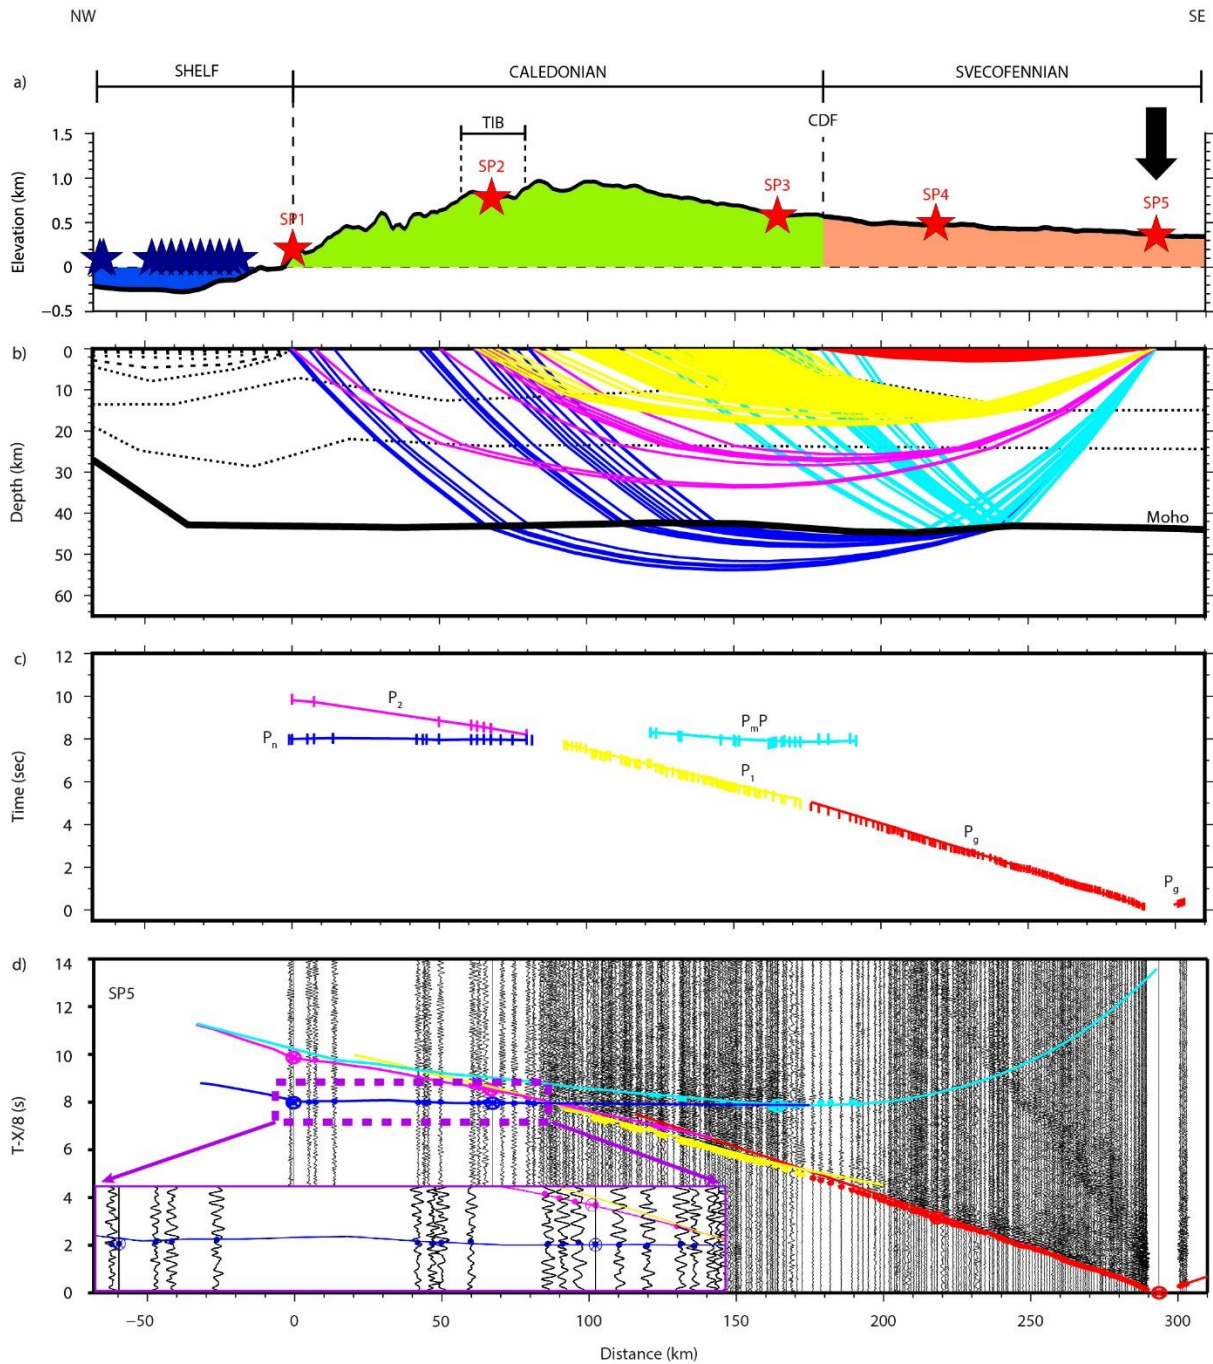

**Supplementary Figure 9. Seismic travel time fit for SP5.** As Supplementary Figure 4 for SP5 instead of SP1. Reciprocal arrival times for Pn are marked by purple crosses with circles (d) and in zoomed display for enhancing resolution of the Pn phase.

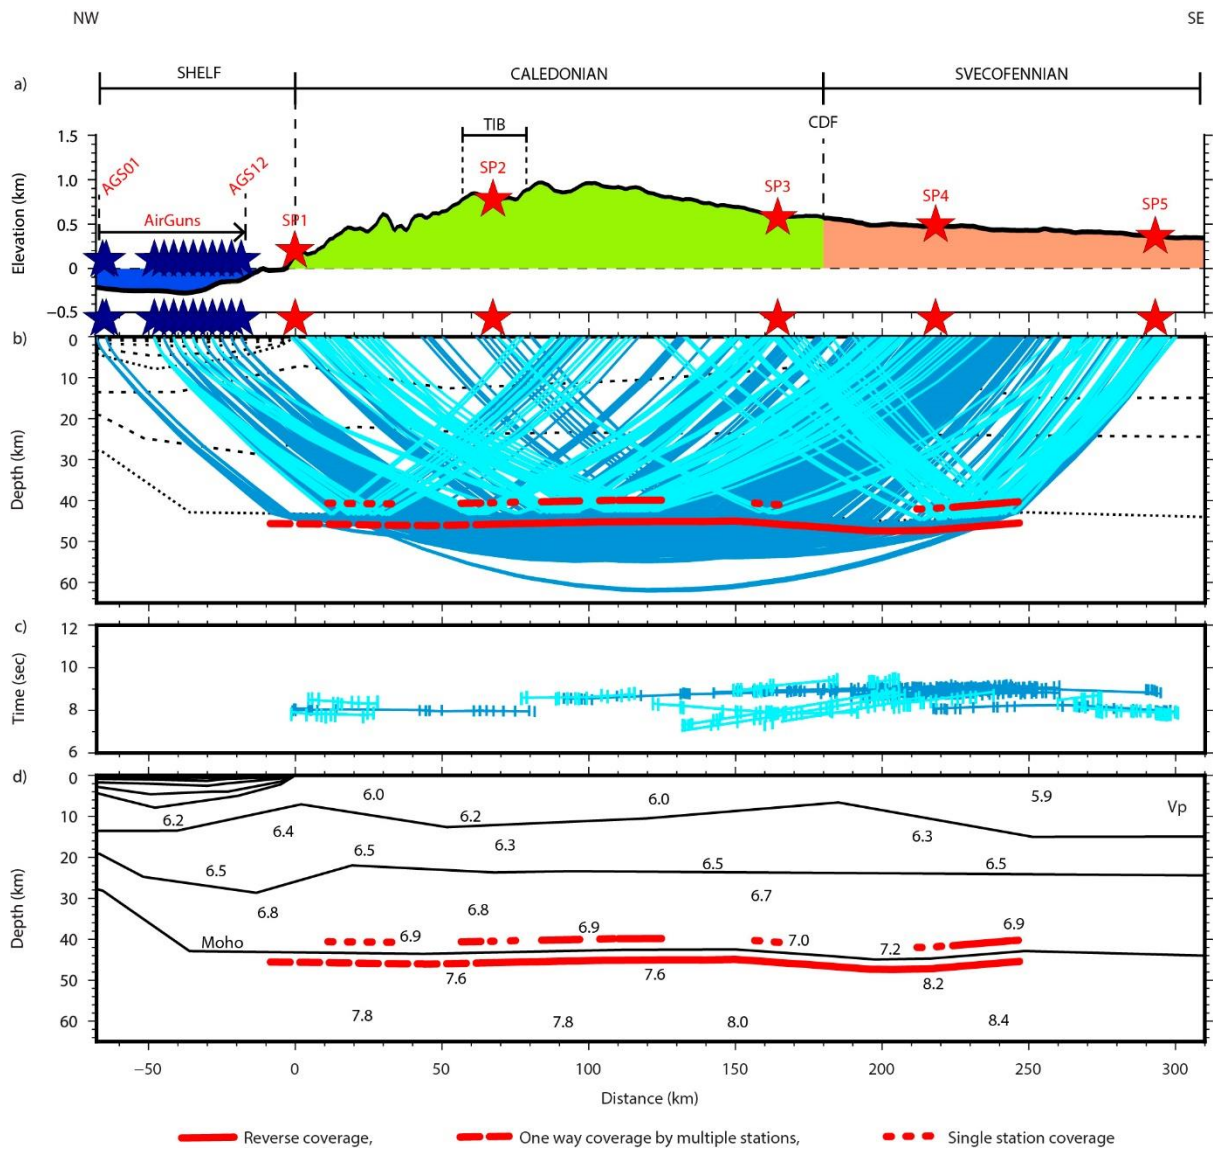

**Supplementary Figure 10. Ray coverage of Moho by the PmP and Pn phases.** As Supplementary Figure 2, illustrating rays (b) and arrival times (c) for the Moho phases PmP and Pn phases only. **b)** Turquoise solid lines show rays for PmP reflections from Moho, and light blue solid lines show rays for Pn refractions from Moho. **d)** Simplified velocity model with illustration of the coverage of Moho by the PmP and Pn phases as described in legend.

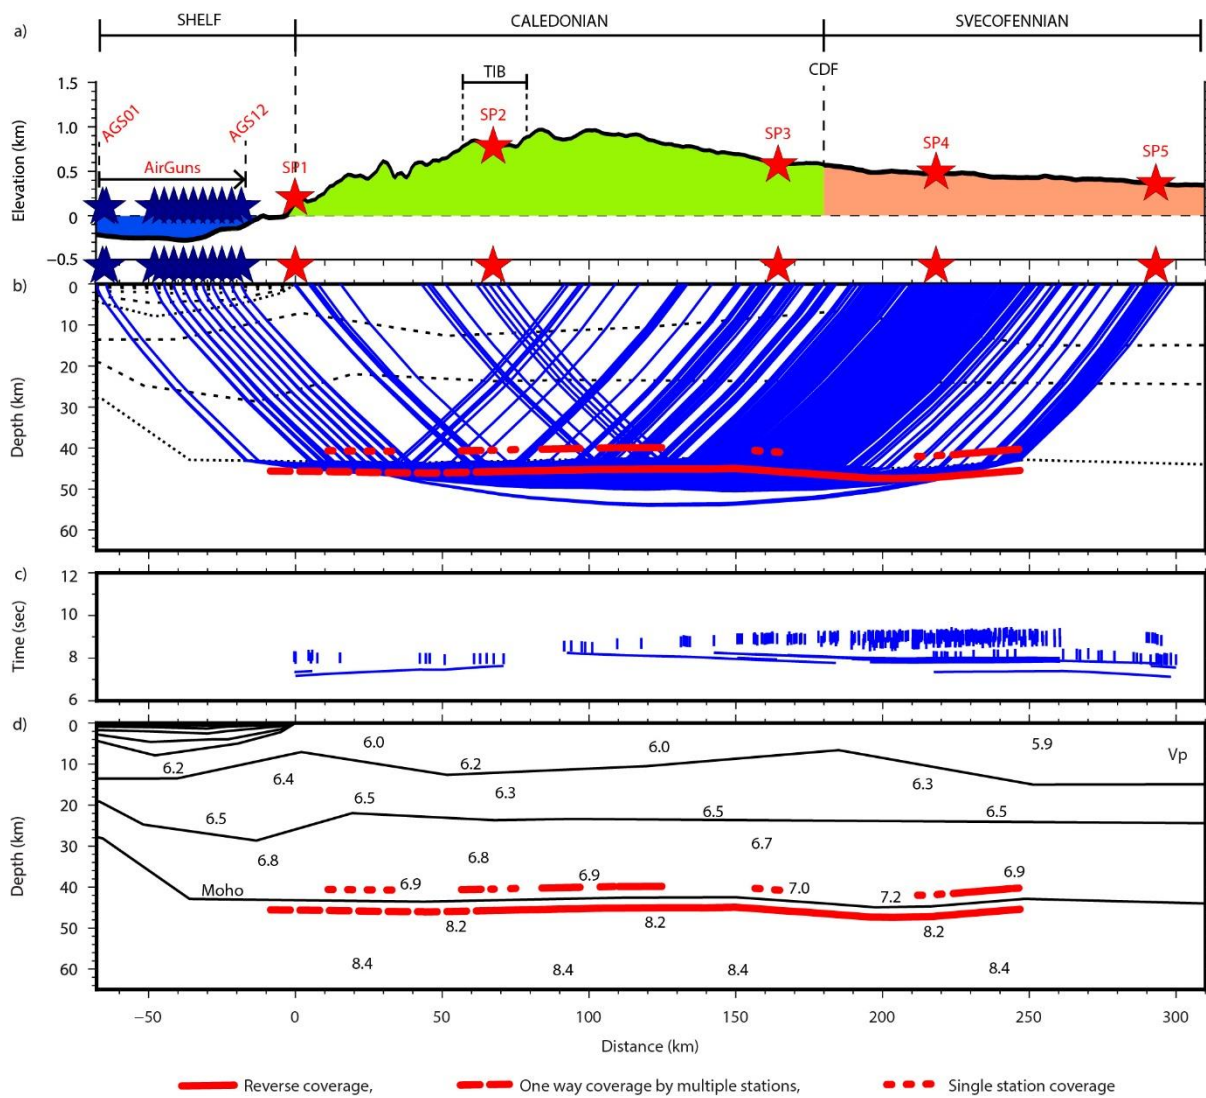

**Supplementary Figure 11. Ray coverage of Moho by the Pn phases.** As Supplementary Figure 10 for Pn instead of PmP and Pn. Sub-Moho velocity is constant to  $8.2 \text{ km s}^{-1}$ . Pn calculated times arrives early and do not fit on selected picks from the seismic section.

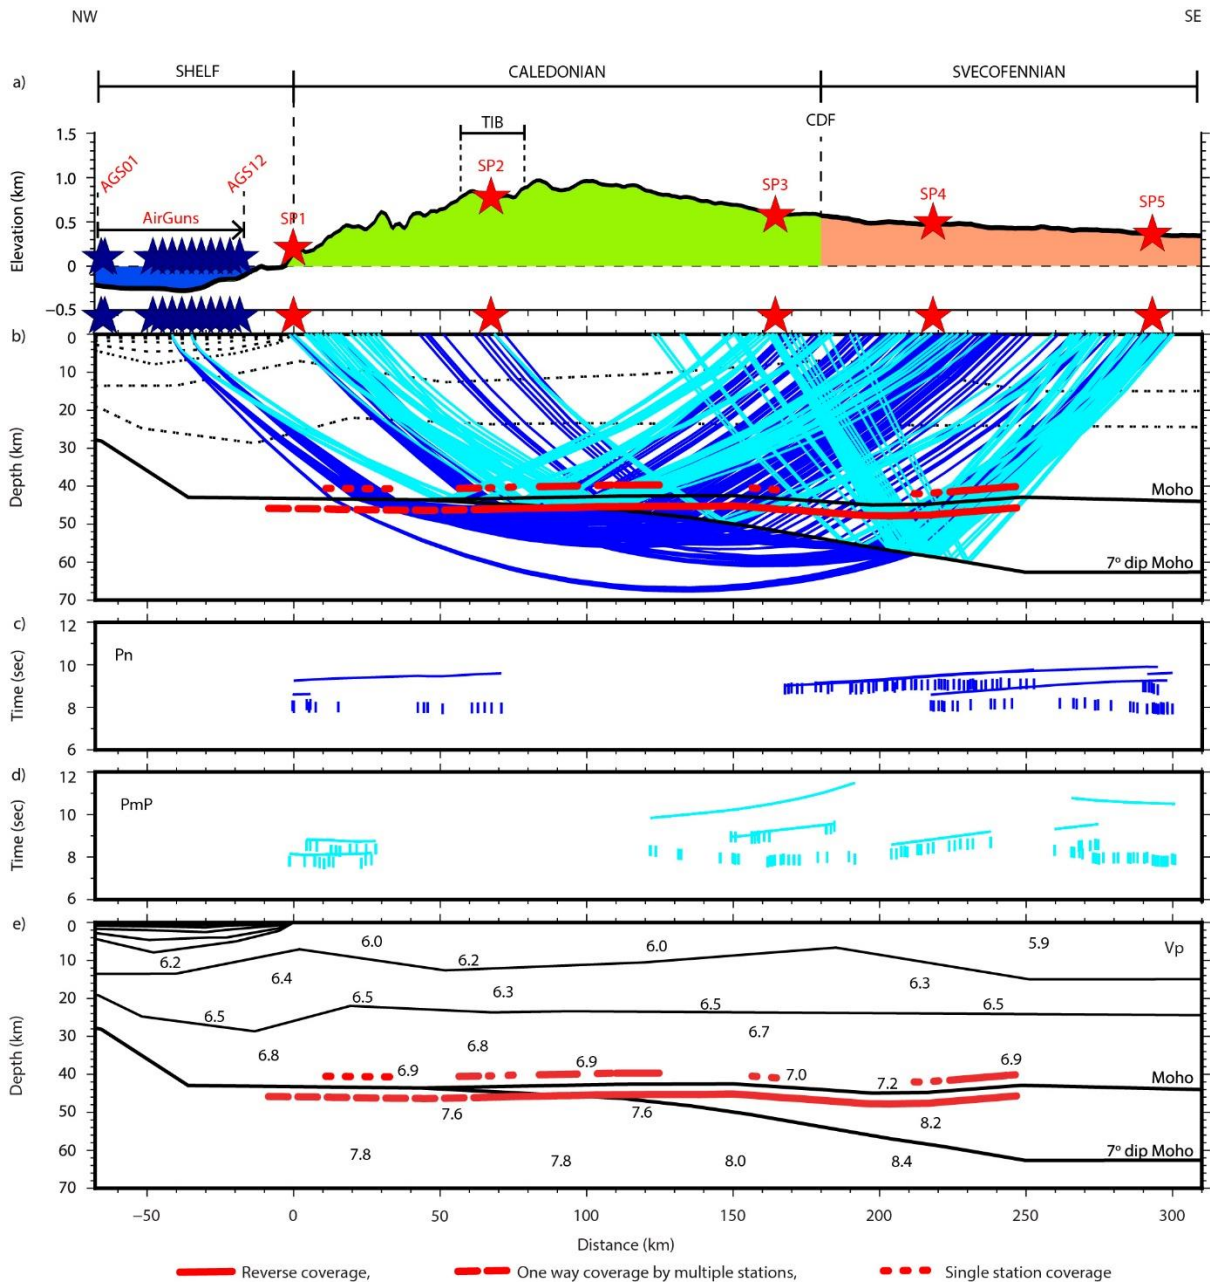

**Supplementary Figure 12. Ray coverage of Moho by the PmP and Pn phases.** As Supplementary Figure 10 except arrival times for 7° dip Moho (c) and (d) for the Moho phases Pn and PmP phases only. e) Simplified velocity model with illustration of the coverage of 7° dip Moho by the PmP and Pn phases.

## **Explanatory Note: Gravity Model Sensitivity Test**

The density values in units C1, C2, S1 and S2 of the model are changed within possible ranges to observe how density variation affects the calculated gravity and hypsometry (Supplementary Figures 13b – 16b and Supplementary Figures 13a – 16a). We apply changes in steps of  $0.050 \text{ g cm}^{-3}$  for the density of units C1 and S1 (Supplementary Figures 13e and 15e) and  $0.025 \text{ g cm}^{-3}$  for units C2 and S2 (Supplementary Figures 14e and 16e).

The root mean square (RMS) difference between observed and calculated Bouguer anomaly is presented in Supplementary Figures 13d – 16d. Ideally, the minimum RMS values should represent the optimum density value for the objected unit. The lowest RMS value is provided by model test number 4 for unit C1 and unit C2 below the high topography (Supplementary Figures 13d and 14d) and model 5 for units S1 and S2 (Supplementary Figures 15d and 16d). We selected model 5 as our preferred model as we gave priority to fitting the calculated hypsometry rather than the Bouguer gravity anomaly, which fits within 23 mGal (Supplementary Figures 15d and 16d).

We also test the importance of the selected compensation depth of 120 km by calculating topography and Bouguer anomalies for variable density of C2 and S1 for compensation depths of 110 km (17) and 130 km (18). We apply similar changes in density steps of  $0.025 \text{ g cm}^{-3}$  (Supplementary Figures 17 and 18). We keep the same density in S1 and C2. The test shows that model 5 is stable for this 20 km variation of the compensation depth.



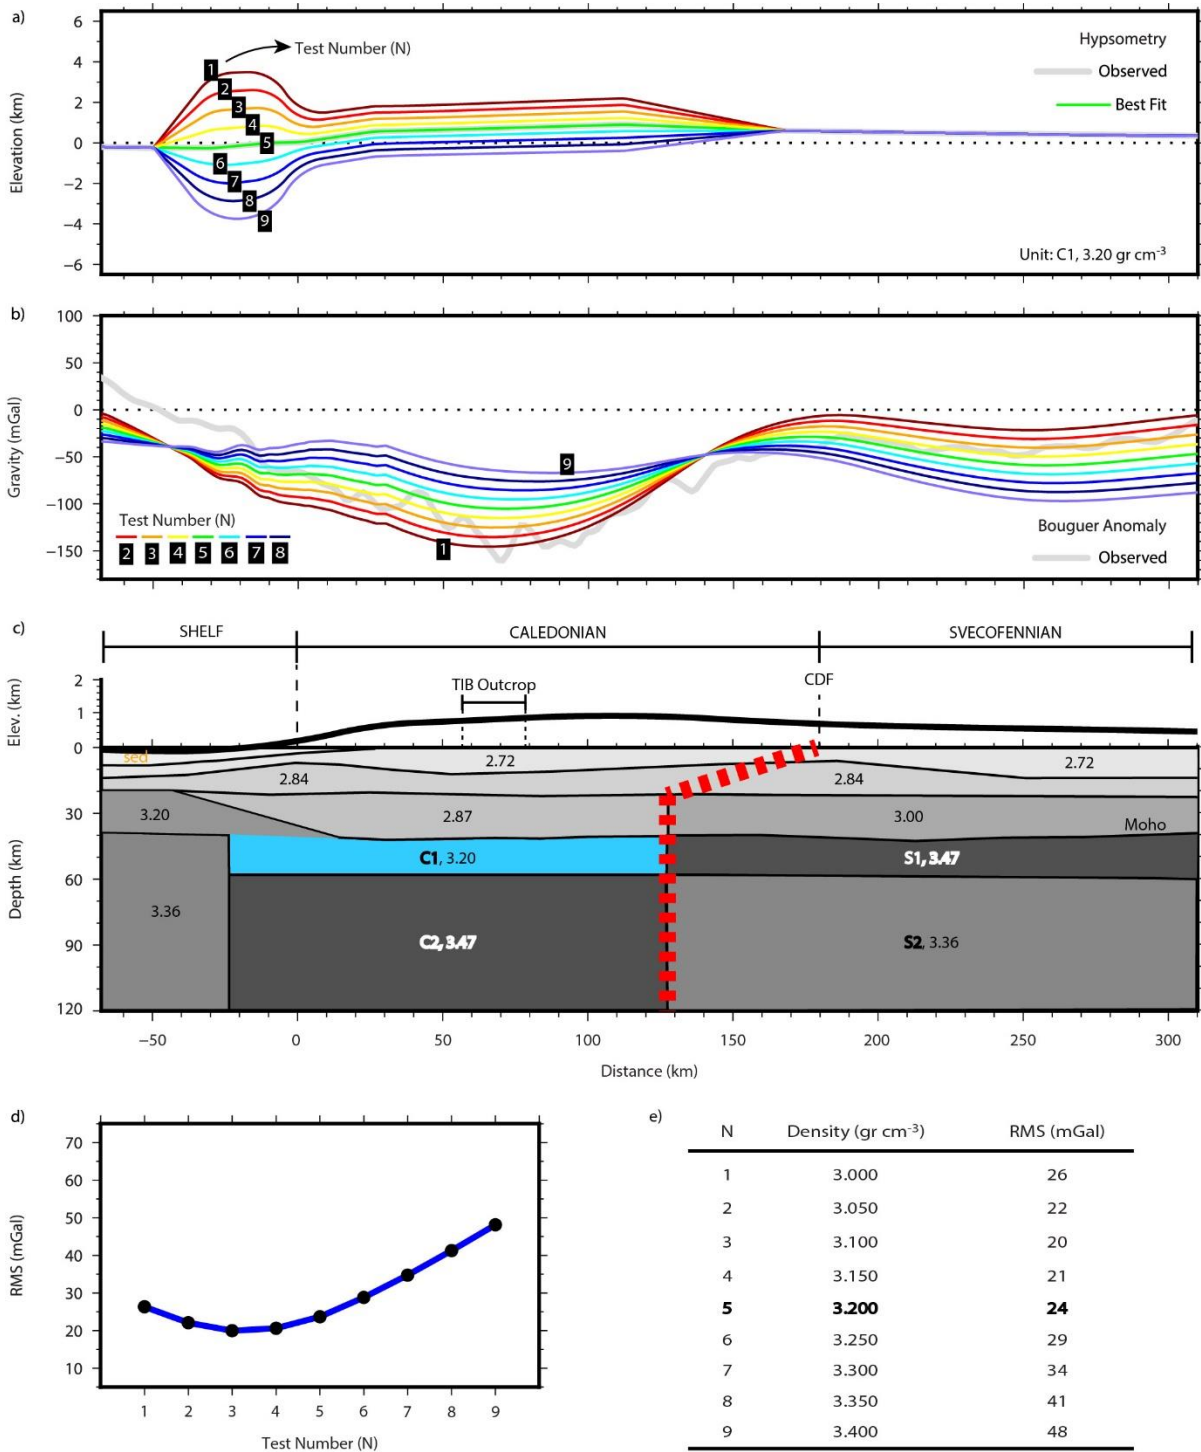

**Supplementary Figure 13. Gravity model sensitivity test for unit C1. a)** Observed (thick grey line) and calculated (coloured lines from 1 to 9) hypsometry for variable density values given in (e). Densities of other units in the gravity model are held constant. **b)** Observed and calculated Bouguer anomalies for the same density variation. **c)** Gravity model with density units. CDF: Caledonian Deformation Front; TIB – Transscandinavian Igneous Belt. **d)** Root mean square (RMS) misfit between observed and calculated Bouguer anomalies versus test number. **e)** Table showing test number, density of unit C1 and RMS misfit of Bouguer anomaly.

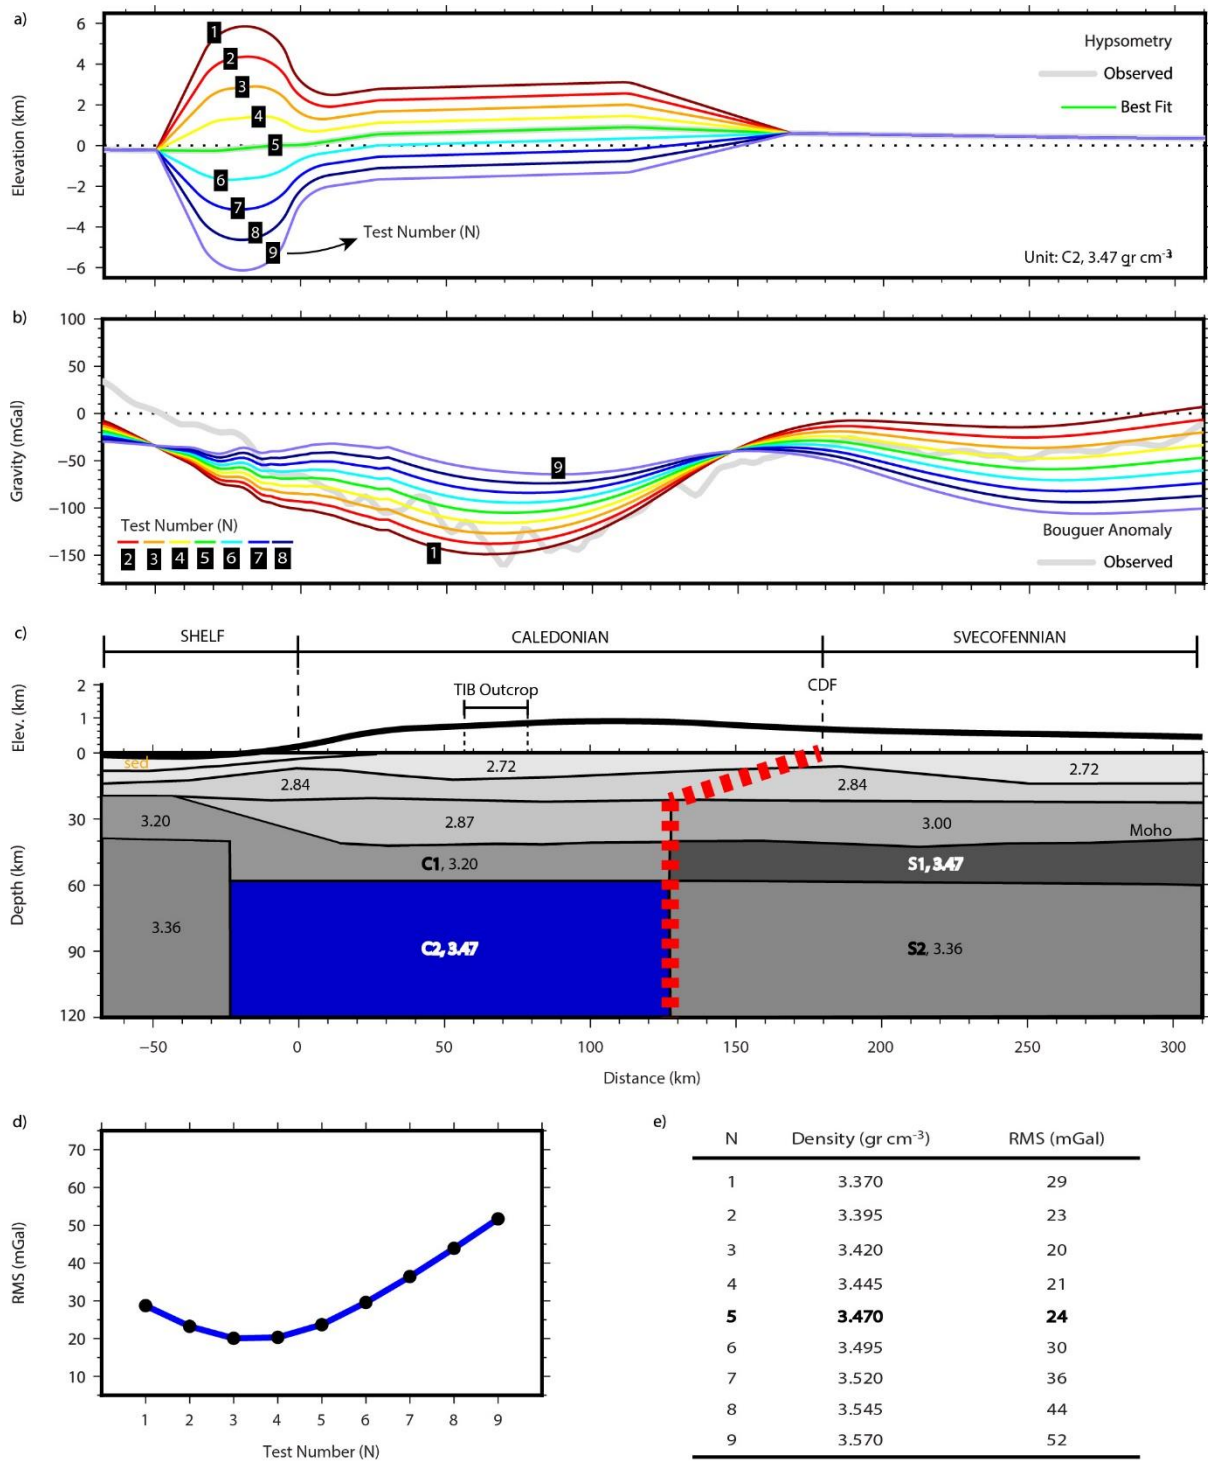

**Supplementary Figure 14. Gravity model sensitivity test for unit C2, cf. description in Supplementary Figure 10.**

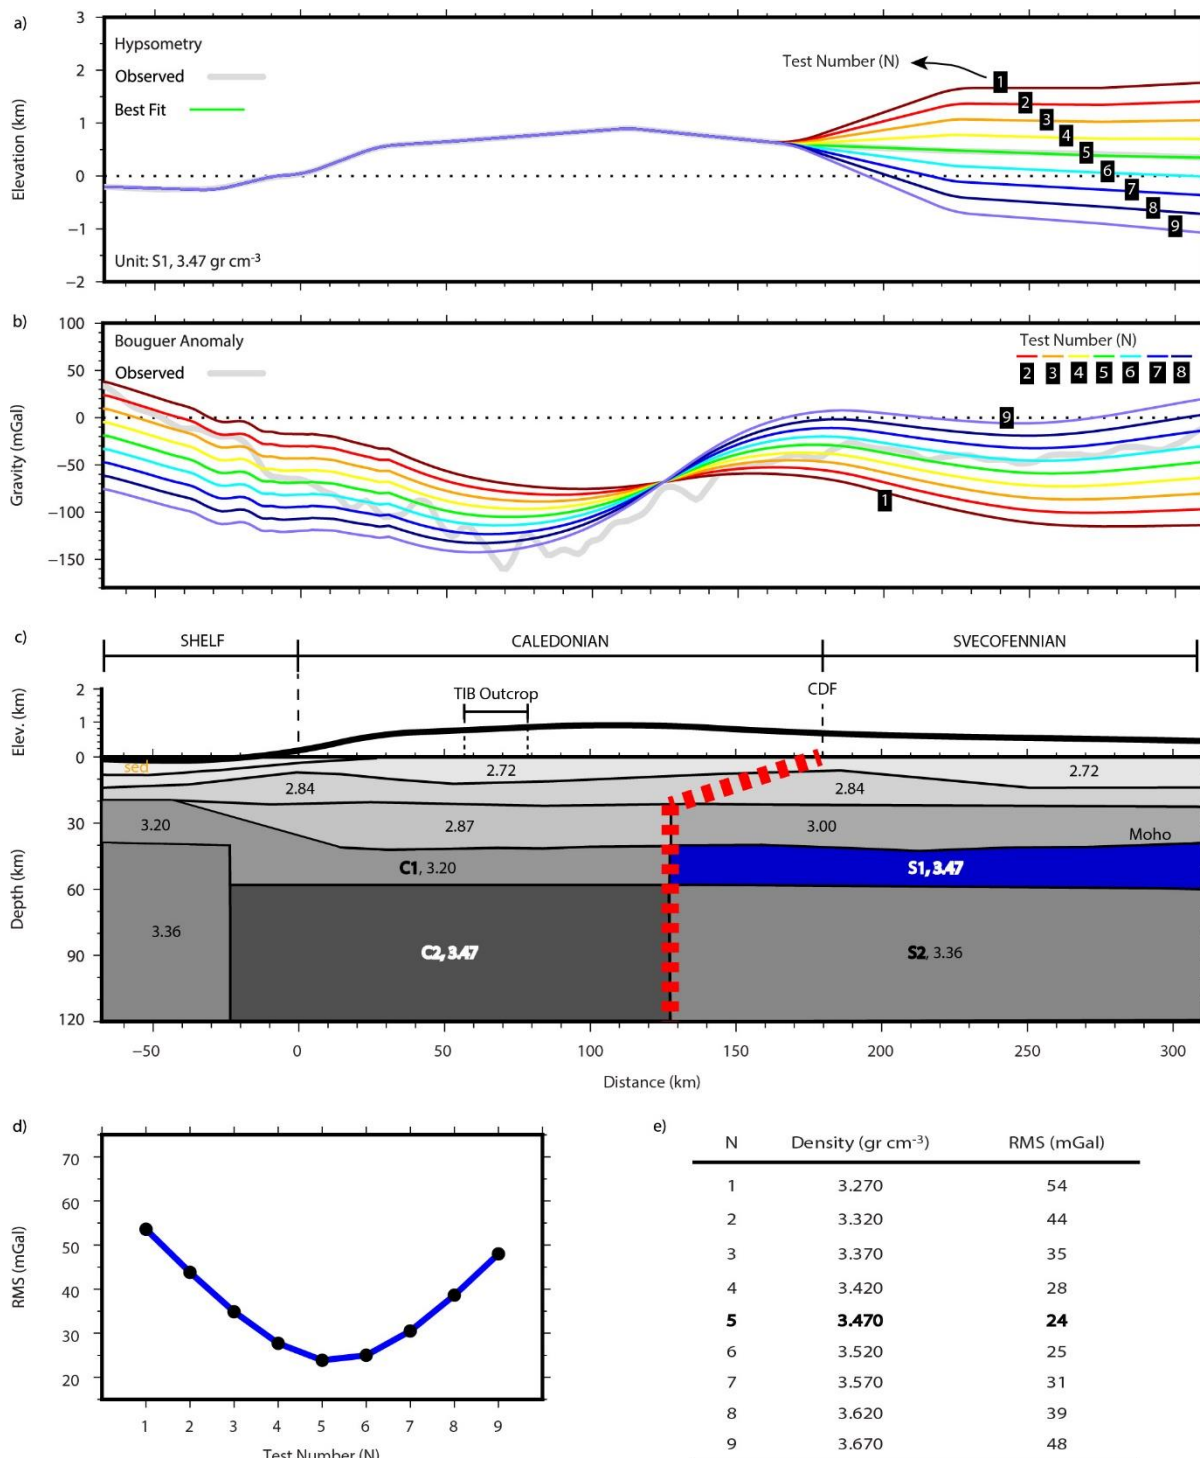

**Supplementary Figure 15. Gravity model sensitivity test for unit S1, cf. description in Supplementary Figure 10.**

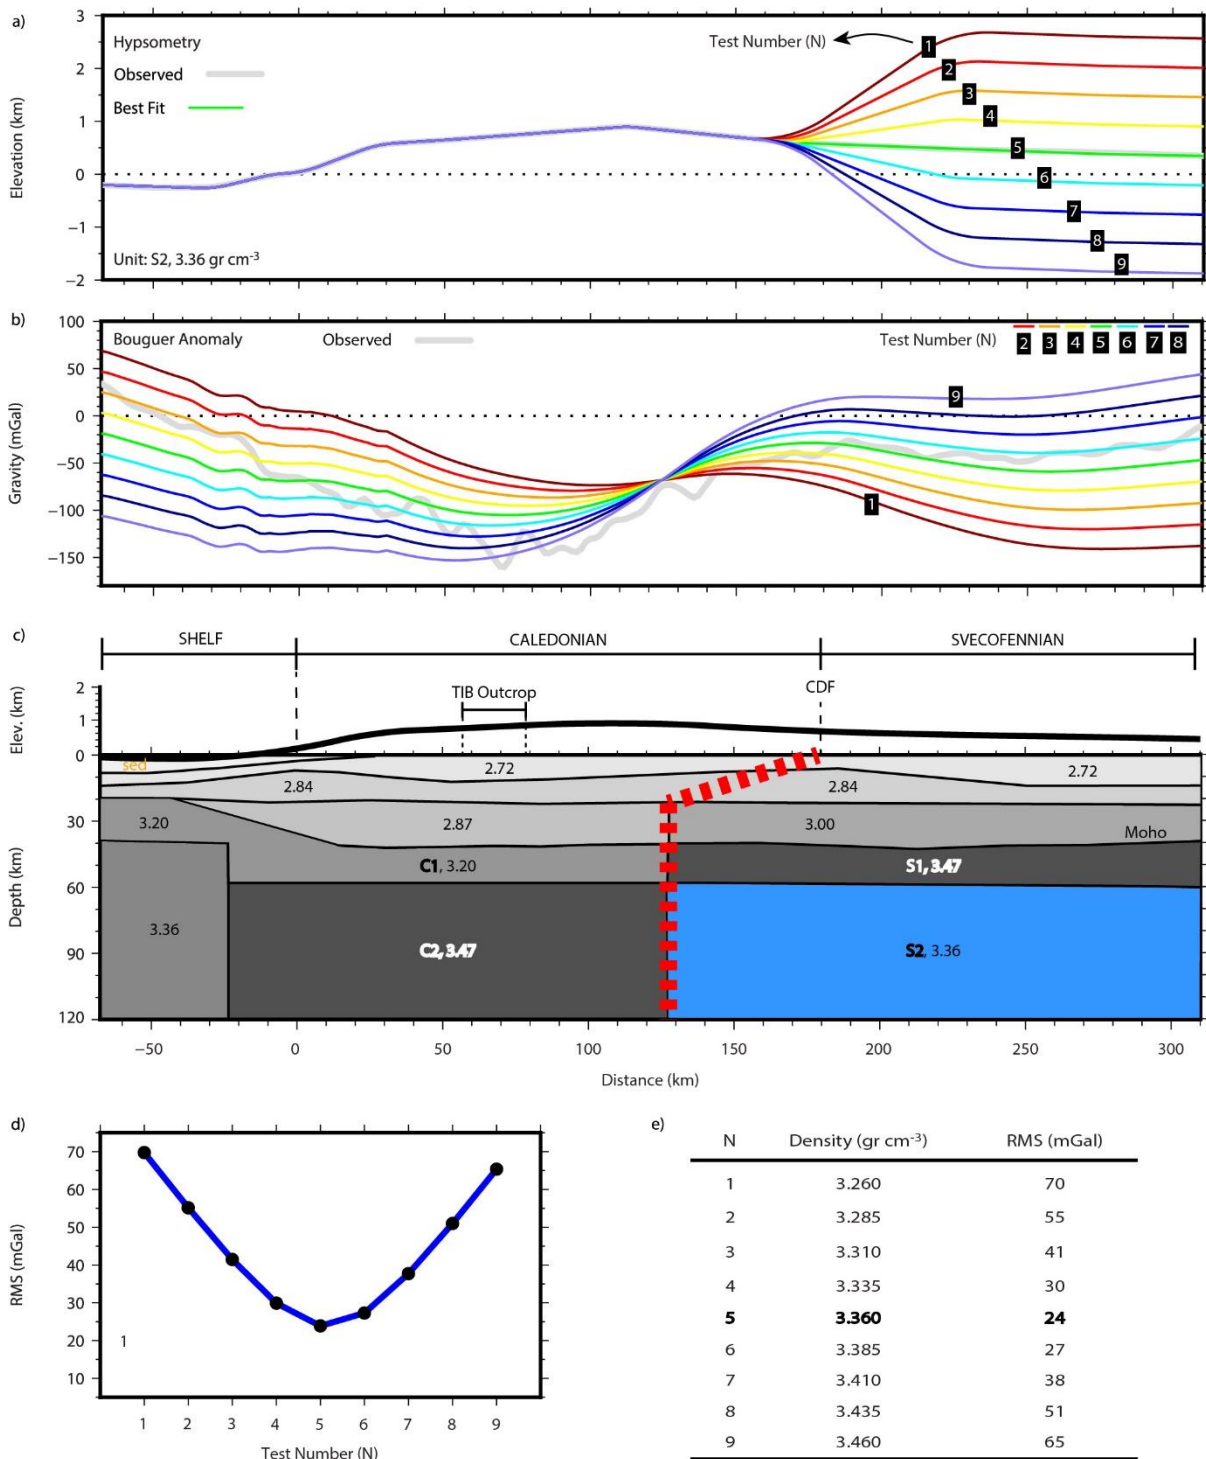

**Supplementary Figure 16. Gravity model sensitivity test for unit S2, cf. description in Supplementary Figure 10.**

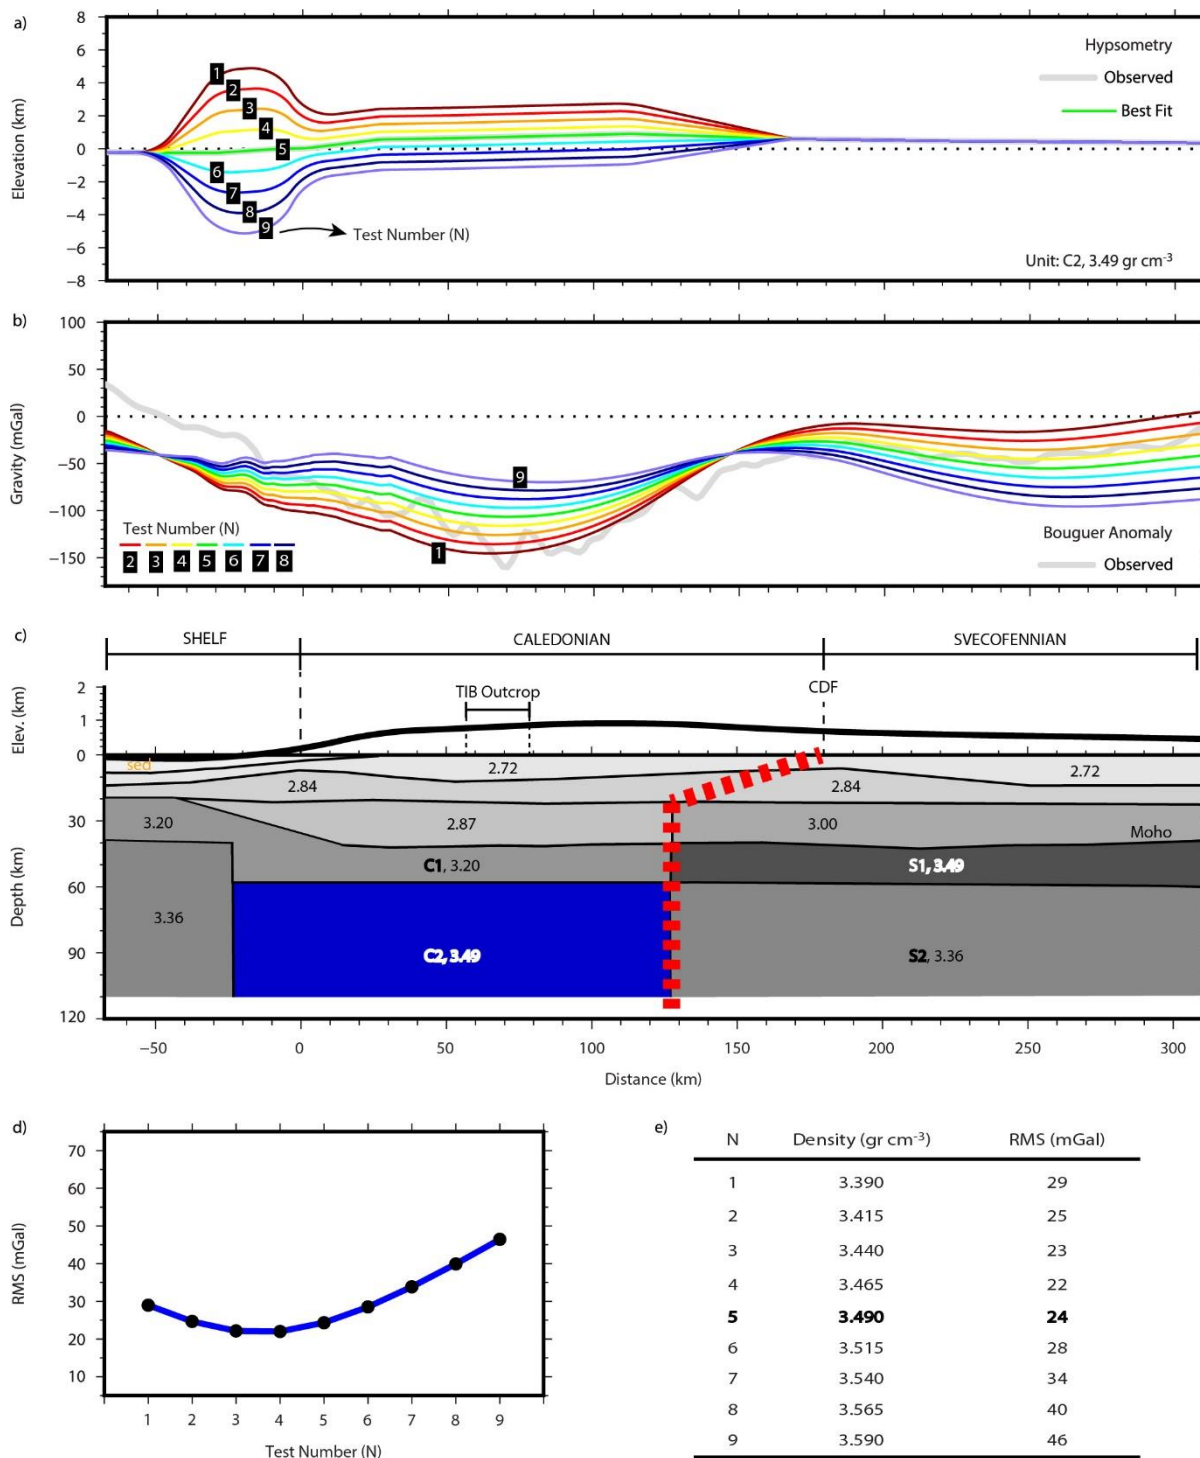

**Supplementary Figure 17. Gravity model sensitivity test for unit for a compensation depth of 110 km instead of the selected 120 km, cf. description in Supplementary Figure 10.**

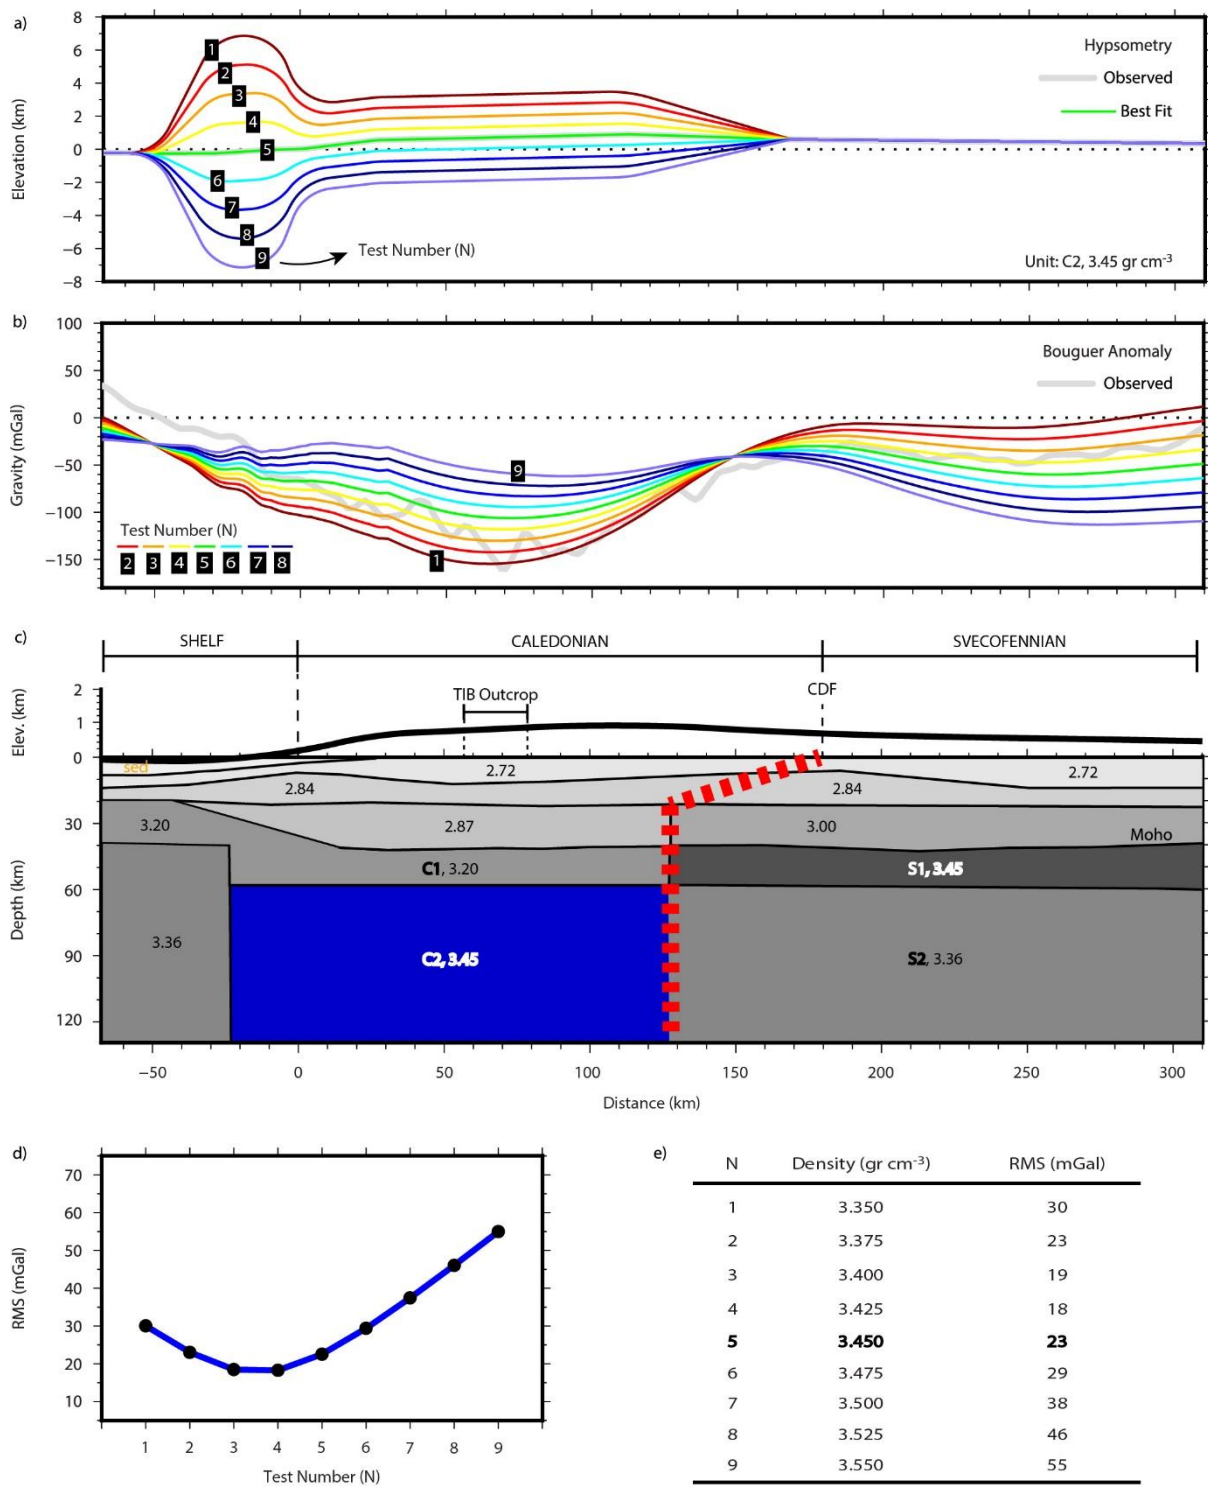

**Supplementary Figure 18. Gravity model sensitivity test for unit for a compensation depth of 130 km instead of the selected 120 km, cf. description in Supplementary Figure 10.**

**Supplementary Table 1. Seismic station parameters for data acquisition.**

| Number of stations | Recorder | Sampling rate [ms] |
|--------------------|----------|--------------------|
| 170                | Texan    | 4                  |
| 102                | Sercel   | 6                  |

**Supplementary Table 2. Shot parameters for data acquisition.**

| Shot points Number | Latitude(°) | Longitude(°) | Altitude(m) | Charge size |
|--------------------|-------------|--------------|-------------|-------------|
| AGS01              | 67.5876     | 13.0157      | 0           | 18 x 22 ℓ   |
| AGS02              | 67.5704     | 13.0788      | 0           | 18 x 22 ℓ   |
| AGS03              | 67.4839     | 13.3925      | 0           | 18 x 22 ℓ   |
| AGS04              | 67.4665     | 13.4549      | 0           | 18 x 22 ℓ   |
| AGS05              | 67.4492     | 13.5174      | 0           | 18 x 22 ℓ   |
| AGS06              | 67.4317     | 13.5796      | 0           | 18 x 22 ℓ   |
| AGS07              | 67.4143     | 13.6419      | 0           | 18 x 22 ℓ   |
| AGS08              | 67.3968     | 13.7039      | 0           | 18 x 22 ℓ   |
| AGS09              | 67.3793     | 13.7659      | 0           | 18 x 22 ℓ   |
| AGS10              | 67.3618     | 13.8278      | 0           | 18 x 22 ℓ   |
| AGS11              | 67.3443     | 13.8897      | 0           | 18 x 22 ℓ   |
| AGS12              | 67.3270     | 13.9520      | 0           | 18 x 22 ℓ   |
| SP1                | 67.1373     | 14.1251      | 45          | 400 kg      |
| SP2                | 66.8049     | 15.4244      | 158         | 200 kg      |
| SP3                | 66.2887     | 17.1822      | 487         | 200 kg      |
| SP4                | 66.0685     | 18.2765      | 500         | 200 kg      |
| SP5                | 65.5812     | 19.4484      | 434         | 400 kg      |

**Supplementary Table 3. Statistical parameters of seismic P-wave modelling for all shots.**

| Phase Number | Total number of picks | The number of picks for modelling | Uncertainty(ms) | $t_{RMS}(ms)$ | $\chi^2$ |
|--------------|-----------------------|-----------------------------------|-----------------|---------------|----------|
| $P_g$        | 610                   | 600                               | 75              | 0.094         | 1.561    |
| $P_1$        | 446                   | 446                               | 75              | 0.070         | 0.874    |
| $P_{c1}P$    | 80                    | 80                                | 100             | 0.074         | 0.562    |
| $P_2$        | 97                    | 87                                | 75              | 0.041         | 0.166    |
| $P_{c2}P$    | 74                    | 74                                | 100             | 0.071         | 0.513    |
| $P_mP$       | 128                   | 128                               | 100             | 0.084         | 0.708    |
| $P_n$        | 341                   | 338                               | 100             | 0.049         | 0.240    |
| Total        | 1776                  | 1753                              |                 | 0.076         | 0.908    |

**Supplementary Table 4. Statistical parameters of seismic P-wave modelling for onshore explosive sources.**

| Phase Number | Total number of picks | The number of picks for modelling | Uncertainty(ms) | $t_{RMS}(ms)$ | $\chi^2$ |
|--------------|-----------------------|-----------------------------------|-----------------|---------------|----------|
| $P_g$        | 586                   | 577                               | 75              | 0.095         | 1.596    |
| $P_1$        | 195                   | 195                               | 75              | 0.082         | 1.215    |
| $P_{c1}P$    | 77                    | 77                                | 100             | 0.076         | 0.581    |
| $P_2$        | 41                    | 37                                | 75              | 0.035         | 0.124    |
| $P_{c2}P$    | 19                    | 19                                | 100             | 0.122         | 1.561    |
| $P_mP$       | 89                    | 89                                | 100             | 0.089         | 0.807    |
| $P_n$        | 54                    | 53                                | 100             | 0.048         | 0.239    |

|       |      |      |       |       |
|-------|------|------|-------|-------|
| Total | 1061 | 1047 | 0.088 | 1.257 |
|-------|------|------|-------|-------|

**Supplementary Table 5. Statistical parameters of seismic P-wave modelling for airgun shots.**

| Phase Number      | Total number of picks | The number of picks for modelling | Uncertainty(ms) | t <sub>RMS</sub> (ms) | $\chi^2$ |
|-------------------|-----------------------|-----------------------------------|-----------------|-----------------------|----------|
| P <sub>g</sub>    | 24                    | 23                                | 75              | 0.062                 | 0.706    |
| P <sub>1</sub>    | 251                   | 249                               | 75              | 0.059                 | 0.616    |
| P <sub>c1</sub> P | 3                     | 3                                 | 100             | 0.029                 | 0.122    |
| P <sub>2</sub>    | 56                    | 54                                | 75              | 0.045                 | 0.202    |
| P <sub>c2</sub> P | 55                    | 55                                | 100             | 0.041                 | 0.171    |
| P <sub>m</sub> P  | 39                    | 39                                | 100             | 0.069                 | 0.495    |
| P <sub>n</sub>    | 287                   | 287                               | 100             | 0.049                 | 0.239    |
| Total             | 715                   | 710                               |                 | 0.053                 | 0.389    |
